# Supplementary material for: Whole-Brain Calcium Imaging in Larval Xenopus
Source: HighWire-hosted journal article supplement (doi:10.1101/pdb.prot106815), 2020-10-09
Supplement: Supplemental_Movie_S1_Legend.docx [file Supplemental_Movie_S1_Legend.docx]

**Supplemental Movie S1 Legend. Activity-based 3D-reconstruction of glomerular odor maps and individual ORN axon terminals from fast multiphoton calcium imaging experiments.**

Calcium-dependent fluorescence changes (green channel) to L-amino acids with basic/aromatic residues as odor stimuli can be recorded in larval *Xenopus* OB at high spatial and temporal resolution. The calcium indicator fluorescence emission in a volume of multiple image planes in the larval *Xenopus* OB network is measured over time (upper left inset). Axons of ORNs individually labeled beforehand via single-cell electroporation are simultaneously recorded in the scanned volume (red channel) and can be reconstructed (green and magenta) in addition to the odor responsive olfactory glomeruli. Glomerular volumes are reconstructed from plane-wise binary thresholding of fluorescence intensity difference images (see Step 26) for each odorant applied (arginine: light blue; lysine: dark blue; histidine: yellow; phenylalanine: grey; tryptophan: dark red). Specifications of the recorded OB volume: 170 x 170 x 93 µm (512 px x 512 px x 30 image planes) recorded at ~0.7 Hz per image stack.
